# 1 Negative feedback may suppress variation to improve collective 2 foraging performance

3 Andreagiovanni Reina<sup>1,2</sup> and James A. R. Marshall<sup>2,3</sup>

4 <sup>1</sup>IRIDIA, Université Libre de Bruxelles, Belgium

5 <sup>2</sup>Department of Computer Science, University of Sheffield, UK

6 <sup>3</sup>Opteran Technologies Limited, Sheffield, UK

7 emails: [andreagiovanni.reina@ulb.be](mailto:andreagiovanni.reina@ulb.be); [james.marshall@sheffield.ac.uk](mailto:james.marshall@sheffield.ac.uk)

## 8 **Abstract**

9 Social insect colonies use negative as well as positive feedback signals to regulate foraging  
10 behaviour. In ants and bees individual foragers have been observed to use negative pheromones  
11 or mechano-auditory signals to indicate that forage sources are not ideal, for example being  
12 unrewarded, crowded, or dangerous. Here we propose an additional function for negative feedback  
13 signals during foraging, variance reduction. We show that while on average populations will  
14 converge to desired distributions over forage patches both with and without negative feedback  
15 signals, in small populations negative feedback reduces variation around the target distribution  
16 compared to the use of positive feedback alone. Our results are independent of the nature of the  
17 target distribution, providing it can be achieved by foragers collecting only local information. Since  
18 robustness is a key aim for biological systems, and deviation from target foraging distributions  
19 may be costly, we argue that this could be a further important and hitherto overlooked reason  
20 that negative feedback signals are used by foraging social insects.

## 21 **1 Introduction**

22 Collectively-foraging social insects use feedback mechanisms in order to robustly and efficiently  
23 satisfy the nutritional requirements of the colony. Positive feedback signal usage by such foraging  
24 social insects is well known, such as mass-recruitment via pheromone in various ant species [1], and  
25 recruitment of small numbers of individuals such as via the honeybees' waggle-dance [2], or rock ants'  
26 tandem-running [3]. The use of negative feedback signals in these systems has, however received com-  
27 paratively little attention. Negative feedback was predicted to be important for collectively foraging  
28 species [4, 5], and subsequently discovered in diverse systems such as Pharaoh's ants [6, 7] and honey-  
29 bees [8, 9]. Several studies have interpreted negative feedback as a mechanism to reduce recruitment

30 to a resource based on some aspect of its quality, for example allowing unrewarded trails to be shut  
31 down [6, 7], allowing recruitment to a crowded source of forage to be reduced [10], or transferring  
32 information that a forage patch may have an increased predation risk [8, 11]. Subsequent studies have  
33 similarly focussed on the role of negative feedback in dealing with time-varying forage patches [12, 13],  
34 or with the amount of available comb storage space [14].

35 Here we propose an alternative function for negative feedback mechanisms in collective foraging,  
36 suppression of costly variation in the colony's foraging performance. In the following, we present simple  
37 models of collective foraging with positive and negative feedback, and with positive feedback only.  
38 We show how both models are able to approach a desired target distribution over forage patches on  
39 average, when forager populations are assumed to be infinite. However, when finite forager populations  
40 are modelled, the two foraging systems differ in the robustness with which they achieve the target  
41 distribution; with positive feedback only, stochastic fluctuations can lead to the forager population  
42 being far from its target distribution at any point in time, however by adding negative feedback  
43 the forager distribution becomes more robust. We argue that this will increase colony-level foraging  
44 success [15, 16], and thus may represent a new functional explanation for the observation of negative  
45 feedback in foraging by social insect colonies.

46 Foraging theory is an active and complex research area, and our results do not rely on assumptions  
47 about the nature of the colony's target distribution, other than it can be achieved by agents with access  
48 only to local information at both the forage source, and the colony. Thus, the target distribution may  
49 be akin to an Ideal Free Distribution, in which agents are distributed such that none can improve  
50 overall foraging efficiency by switching to a different forage patch [16, 17]. Alternatively, the target  
51 distribution may be based on the requirement of the colony for different micro- and macro-nutrients  
52 [18, 19, 20, 21]. Or, the target distribution may be based on some other objective entirely, or on  
53 combinations of objectives such as those just discussed. In ignoring the nature of the distribution,  
54 therefore, our focus is purely on the dynamics of foraging, and how negative feedback can improve  
55 this.

56 For our analysis we adapt our model from a simple model of negative feedback for foraging in  
57 honeybee colonies [12], in itself inspired by models of negative feedback in house-hunting honeybee  
58 swarms [22, 23, 24]; however since other social insect species such as Pharaoh's Ants also make use of  
59 negative feedback during foraging [6], we argue that the model is generally applicable.

## 60 2 Methods

61 We assume a target distribution of the individuals to the  $n$  patches in quantities proportional to  
62 the relative patch quality arbitrarily defined:

$$x_i^* \approx \frac{q_i}{\sum_{j \in n} q_j}, \quad i \in \{1, \dots, n\}, \quad (1)$$

63 where  $q_i$  is the quality of patch  $i$ . In our models an individual's state can be either uncommitted  
64 ( $X_U$ ) or committed to patch  $i$  ( $X_i$ ) with  $i \in \{1, \dots, n\}$ . Therefore, based on the number of patches  
65  $n$ , the commitment of the population will be split among  $n + 1$  subpopulations; we represent the  
66 subpopulation proportions as  $x_U$  and  $x_i$ , in the closed interval  $[0, 1]$ . Note that, in a finite population  
67 of  $S$  individuals, it will be impossible for the colony to achieve exactly the desired target distribution  
68 if  $x_i S$  is not an integer number.

69 We analyse the population dynamics of the two systems parametrised to reach the same target  
70 distribution (with and without negative social feedback) using mean-field models of infinite and finite  
71 populations, using ordinary differential equations (ODEs) and stochastic simulation of the master  
72 equation respectively. Both types of analyses can be performed for models derived from chemical  
73 reaction equations, which specify how individuals in the system interact and change state (see Table 1).

74 The ODE model assumes an infinitely-large population size  $S$  and provides deterministic system  
75 dynamics in the absence of any noise from finite population effects. On the other hand, stochastic  
76 simulation of the master equation (Gillespie's SSA [25]) gives a probabilistically correct simulation of  
77 dynamics of finite populations of size  $S$ .

78 While previous research has documented that collective foraging is regulated by the actions and  
79 interactions that we included in our models, the relationship between their frequency (transition rates)  
80 and the estimated nest-site quality are still debated. Table 1 reports the best functions we obtained  
81 through numerical optimisation to approximate the target distribution. Including negative inevitably  
82 feedback inevitably requires a change also in the recruitment function, from constant to linearly pro-  
83 portional to the quality. In the Supplementary Text ST1 we show the numerical optimisation analysis  
84 and results for a variety of assumptions. Here, we assume that social recruitment (positive feedback)  
85 is much more efficient than independent discovery, so  $r_i \gg q_i$ , as has been documented in a large  
86 variety of social insect species [26, 27, 28, 29]. For fair comparison, the average recruitment strength  
87  $r$  is equalised between the two models so that quality-sensitive recruitment transitions—model with  
88 negative feedback—happens on average at the same rate of quality-insensitive recruitment—model  
89 without negative feedback (see Supplementary Text ST2). The model with only positive feedback  
90 is easy to solve for the desired equilibrium distribution of foragers, with a simple parameterisation  
91 of individuals' rates (see Supplementary Text ST3). The model with negative feedback, however,  
92 requires a heuristic individual parameterisation based on site qualities, which we perform numerically.  
93 However, this heuristic has a simple functional form (see Supplementary Figure SF2) so could easily  
94 be approximated by real foragers.

### 95 **3 Results**

96 The two top panels of Figure 1 show the time dynamics of the two models for representative values  
97 and  $n = 3$  patches. Both models asymptotically approximate the target distribution of Eq. (1).

98 Through numerical integration of the master equations, we investigate the effect of stochastic

|                                            |                                       | WITHOUT<br>NEGATIVE<br>FEEDBACK | SOCIAL | WITH<br>NEGATIVE<br>FEEDBACK | SOCIAL |
|--------------------------------------------|---------------------------------------|---------------------------------|--------|------------------------------|--------|
| Independent discovery                      | $X_U \xrightarrow{q_i} X_i$           | Quality-sensitive               |        | Quality-sensitive            |        |
| Independent abandonment (leak)             | $X_i \xrightarrow{a} X_U$             | Constant                        |        | Constant                     |        |
| Recruitment (positive social feedback)     | $X_U + X_i \xrightarrow{r_i} 2X_i$    | Constant                        |        | Quality-sensitive            |        |
| Stop signalling (negative social feedback) | $X_i + X_i \xrightarrow{z} X_U + X_i$ |                                 |        | Constant                     |        |

Table 1: The two analysed models can be described in terms of transitions between commitment states by individuals. The commitment states are ‘committed to foraging patch  $i$ ’ ( $X_i$ ) or ‘uncommitted’ ( $X_U$ ). Both models have the same positive and negative feedback for *independent transitions*: quality-dependent discovery and constant abandonment (leak  $a$ ). The difference lies in the social feedback; one model (blue) has quality-insensitive recruitment ( $r_i = \rho$ ) but no negative social feedback ( $z = 0$ ). The other model (red) has both quality-sensitive recruitment ( $r_i = \rho q_i$ ) and quality-insensitive self-inhibition ( $z > 0$ ), as reported by field observations [30]. In these representative models, we set rates as constant and (linear) quality-sensitive functions of the quality according to the best function we obtain with numerical optimisation (see Supplementary Text ST1).

99 fluctuations on the system dynamics [25]. The fluctuation size is inversely proportional to the system  
100 size  $S$ , *i.e.* there are no fluctuations in very large groups (*i.e.*  $S \rightarrow \infty$ ) and large fluctuation in small  
101 groups. The effect of the system-size noise can be appreciated in the two bottom panels of Figure 1.  
102 They show 30 representative trajectories for a system of size  $S = 200$ . The higher variance can also  
103 be appreciated in the boxplots on the right of each bottom panel of Figure 1, in which the average of  
104 1,000 simulations hits the target value in both models; however, the variance is reduced considerably  
105 with the introduction of negative social feedback. These results are not specific to the representative  
106 example of Figure 1, but are consistent throughout the wide parameter space (see analysis in the  
107 Supplementary Text ST4). Additionally, increasing abandonment, which is a form of independent,  
108 asocial negative feedback, is not sufficient to reduce variance (see Supplementary Text ST5).

109 Large deviations from the target distribution could compromise the ability of the colony to in-  
110 take the necessary nutrients for survival and reproduction, thus decreasing colony fitness. Figure 2  
111 shows how the error in achieving the target distribution is significantly higher without negative social  
112 feedback. Similarly, the speed of adaptation to environmental changes is an important factor in the  
113 survival of the colony [31, 32]. The system without negative feedback can be incapable of adapting to  
114 changes in a timely manner because its temporal dynamics vary significantly depending on the initial  
115 commitment (see top-left inset of Figure 1). The system with negative feedback, instead, displays  
116 a constant convergence time regardless of the initial state of the system (see Supplementary Text  
117 ST6). Figure 3 shows how the convergence speed and the deviation from the target distribution are  
118 influenced by the strength of the negative feedback; the strength of negative feedback can tune a  
119 speed-robustness trade-off, similarly to the tuning of speed-value and speed-coherence trade-offs in  
120 consensus decisions [23, 24, 33]. In agreement with field observations of honeybees, which increase  
121 stop signalling when a quick response is necessary [10], our analysis also predicts a speed-up of the  
122 group dynamics for higher levels of negative feedback.

## 123 4 Discussion

124 Negative feedback has been considered in collective decisions, particularly as a means of symmetry  
125 breaking [22, 23, 24, 34], and in foraging, as a means of adapting to dynamically changing environments  
126 [10, 7, 12, 13]. Other than in entomology, negative feedback has been observed as a tool for noise  
127 reduction in gene networks [35, 36, 37] and in electronic systems [38, 39]. Here we have shown that  
128 negative feedback may play an important role in reducing variance in colony foraging performance. For  
129 example, considering the honeybee system that inspired our model, field observations have reported  
130 that levels of stop signalling increase in response to changes such as dangerous, overcrowded, or  
131 depleted food patches [13, 40, 11, 10]; however, it has not yet been fully understood why, even in  
132 static conditions, honeybees always deliver a small number of stop signals to foragers visiting the  
133 same forage patch [13, 10]. This pattern is consistent with our model, and the analysis presented is  
134 an interpretation for such observed behaviour.

135 Our results suggest a further progression in the evolution of collective foraging behaviour; solitary  
136 foraging by members of social insect colonies evolved first, but was comparatively inefficient due to  
137 the need for foragers to repeatedly and independently discover forage sites [41, 42] (see Supplementary  
138 Text ST8). Subsequently, positive social feedback evolved to improve foraging efficiency [43, 44, 45],  
139 but this came at the expense of robustness of the foraging outcome, through increased variance in  
140 foraging performance (see Supplementary Text ST9). Finally, negative feedback evolved not only to  
141 respond better to changing environments, but also to reduce variance in foraging performance. The  
142 re-use of negative feedback signals, such as in the case of honeybee stop-signals which are used in  
143 both foraging [10] and house-hunting [22] life history stages, would facilitate performance-enhancing  
144 innovations in signalling behaviours; however, it is not clear whether stop-signalling first arose in  
145 foraging or in house-hunting contexts (intuitively, we suggest the former, a more common life history  
146 event).

147 Some species have not evolved negative signalling mechanisms but rely on natural decay of feed-  
148 back, such as pheromone evaporation. For instance, *Lasius niger* ants rely on the downregulation  
149 of positive feedback (*i.e.* pheromone deposition) in order to let pheromone decay take over [46, 47].  
150 It is worth noting that this is not technically negative feedback; given the time taken from the first  
151 observations of the positive-feedback signals in colonies of honeybees and ants [3, 48, 49] to that of  
152 the corresponding negative feedback signals [6, 50], it may be worth further exploring social insects  
153 in which explicit negative feedback has not been observed, to search for expected negative feedback  
154 mechanisms, or explain why their life history means they would not be beneficial. As a motivating ex-  
155 ample, decaying waggle dance durations in honeybee swarms were taken to be due to decay processes  
156 internal to scout bees [51], but the negative stop-signal was subsequently discovered to be significant  
157 in these swarms [22].

158 We conclude by noting that our study highlights the importance of using multiscale modelling to  
159 understand collective behaviour [52, 53, 54]. In fact, through mean-field analysis we could not observe

160 the dynamics that justify the use of the negative feedback. Instead, complementing the analysis with  
161 probabilistic models, we have been able to identify the system dynamics that favour the appearance of  
162 stop signalling as a mechanism for variance reduction. Multiscale modelling is a valuable framework  
163 which combines the use of a set of modelling techniques to analyse the system at various levels of  
164 complexity and noise. In this study, we only employed noise-free mean-field analysis and master  
165 equations with system-size dependent noise. However, further analysis could include the impact of  
166 spatial noise, and time-correlated information and/or interactions [52].

## 167 Acknowledgements

168 The authors thank Gianni Di Caro, Ulrike Feudel and David Wagg for useful discussions. This  
169 study was funded by the European Research Council (ERC) under the European Union’s Horizon  
170 2020 research and innovation programme (grant agreement number 647704). A.R. also acknowledges  
171 support from the Belgian F.R.S.-FNRS, of which he is a Chargé de Recherches.

## 172 Code availability

173 All data, simulation code, and a Mathematica notebook reproducing the analyses presented herein  
174 is available in the GitHub repository <https://github.com/Di0DeProject/VarianceSuppression>.

175 This is supplemented by a notebook for MuMoT [52], an open-source tool for multiscale modelling,  
176 which reproduces similar results to those presented herein. The notebook is available online at  
177 [https://mybinder.org/v2/gh/Di0DeProject/MuMoT/master?filepath=DemoNotebooks%2FVariance\\_suppression.ipynb](https://mybinder.org/v2/gh/Di0DeProject/MuMoT/master?filepath=DemoNotebooks%2FVariance_suppression.ipynb).

## 178 Author contributions

179 Both authors conceived the original idea, performed mathematical analyses, and wrote the paper.  
180 A.R. generated the simulation data, and figures.

## 181 Competing interests

182 The authors declare no competing interests.

## 183 References

- 184 [1] B. Hölldobler and E. O. Wilson, *The Ants*. Harvard University Press, 1990.
- 185 [2] T. D. Seeley, *Honeybee Democracy*. Princeton University Press, 2010.
- 186 [3] M. Möglich, U. Maschwitz, and B. Hölldobler, “Tandem calling: A new kind of signal in ant  
187 communication,” *Science*, vol. 186, no. 4168, pp. 1046–1047, 1974.

- 188 [4] T. R. Stickland, N. F. Britton, and N. R. Franks, “Models of information flow in ant foraging:  
189 the benefits of both attractive and repulsive signals,” in *Information Processing in Social Insects*,  
190 pp. 83–100, Basel: Birkhäuser Basel, 1999.
- 191 [5] C. Detrain and J.-L. Deneubourg, “Self-organized structures in a superorganism: do ants “be-  
192 have” like molecules?,” *Physics of Life Reviews*, vol. 3, no. 3, pp. 162–187, 2006.
- 193 [6] E. J. H. Robinson, D. E. Jackson, M. Holcombe, and F. L. W. Ratnieks, “‘No entry’ signal in  
194 ant foraging,” *Nature*, vol. 438, no. 7067, pp. 442–442, 2005.
- 195 [7] E. J. H. Robinson, F. L. W. Ratnieks, and M. Holcombe, “An agent-based model to investigate  
196 the roles of attractive and repellent pheromones in ant decision making during foraging,” *Journal*  
197 *of Theoretical Biology*, vol. 255, no. 2, pp. 250–258, 2008.
- 198 [8] J. C. Nieh, “A negative feedback signal that is triggered by peril curbs honey bee recruitment,”  
199 *Current Biology*, vol. 20, no. 4, pp. 310–315, 2010.
- 200 [9] P. M. Kietzman and P. K. Visscher, “The anti-waggle dance: use of the stop signal as negative  
201 feedback,” *Frontiers in Ecology and Evolution*, vol. 3, no. February, pp. 1–5, 2015.
- 202 [10] C. W. Lau and J. C. Nieh, “Honey bee stop-signal production: temporal distribution and effect  
203 of feeder crowding,” *Apidologie*, vol. 41, no. 1, pp. 87–95, 2010.
- 204 [11] K. Tan, S. Dong, X. Li, X. Liu, C. Wang, J. Li, and J. C. Nieh, “Honey bee inhibitory signaling  
205 is tuned to threat severity and can act as a colony alarm signal,” *PLOS Biology*, vol. 14, no. 3,  
206 p. e1002423, 2016.
- 207 [12] S. Bidari, O. Peleg, and Z. P. Kilpatrick, “Social inhibition maintains adaptivity and consensus  
208 of honeybees foraging in dynamic environments,” *Royal Society Open Science*, vol. 6, no. 12,  
209 p. 191681, 2019.
- 210 [13] T. Borofsky, V. J. Barranca, R. Zhou, D. von Trentini, R. L. Broadrup, and C. Mayack, “Hive  
211 minded: like neurons, honey bees collectively integrate negative feedback to regulate decisions,”  
212 *Animal Behaviour*, vol. 168, pp. 33–44, 2020.
- 213 [14] P. M. Kietzman and P. K. Visscher, “The influence of available comb storage space on the  
214 performance of honey bee communication signals that regulate foraging,” *Apidologie*, vol. 52,  
215 no. 1, pp. 133–140, 2021.
- 216 [15] J. Z. Shik and A. Dussutour, “Nutritional dimensions of invasive success,” *Trends in Ecology &*  
217 *Evolution*, vol. 35, no. 8, pp. 691–703, 2020.
- 218 [16] L.-A. Giraldeau and T. Caraco, *Social foraging theory*. Princeton University Press, 2000.



- 219 [17] A. E. Lamb and J. G. Ollason, “Foraging wood-ants formica aquilonia yarrow (hymenoptera:  
220 formicidae) tend to adopt the ideal free distribution,” *Behavioural Processes*, vol. 28, no. 3,  
221 pp. 189–198, 1993.
- 222 [18] J. M. McNamara, A. I. Houston, and E. J. Collins, “Optimality models in behavioral biology,”  
223 *SIAM Review*, vol. 43, no. 3, pp. 413–466, 2001.
- 224 [19] O. Olsson, J. S. Brown, and K. L. Helf, “A guide to central place effects in foraging,” *Theoretical*  
225 *Population Biology*, vol. 74, no. 1, pp. 22–33, 2008.
- 226 [20] A. Dussutour and S. J. Simpson, “Communal nutrition in ants,” *Current Biology*, vol. 19, no. 9,  
227 pp. 740–744, 2009.
- 228 [21] A. I. Houston and J. M. McNamara, “Foraging currencies, metabolism and behavioural routines,”  
229 *Journal of Animal Ecology*, vol. 83, no. 1, pp. 30–40, 2014.
- 230 [22] T. D. Seeley, P. K. Visscher, T. Schlegel, P. M. Hogan, N. R. Franks, and J. A. R. Marshall,  
231 “Stop signals provide cross inhibition in collective decision-making by honeybee swarms,” *Science*,  
232 vol. 335, no. 6064, pp. 108–111, 2012.
- 233 [23] D. Pais, P. M. Hogan, T. Schlegel, N. R. Franks, N. E. Leonard, and J. A. R. Marshall, “A  
234 mechanism for value-sensitive decision-making,” *PLoS ONE*, vol. 8, no. 9, p. e73216, 2013.
- 235 [24] A. Reina, J. A. R. Marshall, V. Trianni, and T. Bose, “Model of the best-of-N nest-site selection  
236 process in honeybees,” *Physical Review E*, vol. 95, no. 5, p. 052411, 2017.
- 237 [25] D. T. Gillespie, “A general method for numerically simulating stochastic time evolution of coupled  
238 chemical reactions,” *Journal of Computational Physics*, vol. 22, pp. 403–434, 1976.
- 239 [26] E. Bonabeau, G. Theraulaz, and J.-L. Deneubourg, “Group and mass recruitment in ant colonies:  
240 the influence of contact rates,” *Journal of Theoretical Biology*, vol. 195, no. 2, pp. 157–166, 1998.
- 241 [27] R. Chadab and C. Rettenmeyer, “Mass recruitment by army ants,” *Science*, vol. 188, no. 4193,  
242 pp. 1124–1125, 1975.
- 243 [28] A. Dornhaus, F. Klügl, C. Oechslein, F. Puppe, and L. Chittka, “Benefits of recruitment in honey  
244 bees: effects of ecology and colony size in an individual-based model,” *Behavioral Ecology*, vol. 17,  
245 no. 3, pp. 336–344, 2006.
- 246 [29] R. l’Anson Price, C. Grüter, W. O. H. Hughes, and S. E. F. Evison, “Symmetry breaking in  
247 mass-recruiting ants: extent of foraging biases depends on resource quality,” *Behavioral Ecology*  
248 *and Sociobiology*, vol. 70, no. 11, pp. 1813–1820, 2016.
- 249 [30] R. T. Jack-McCollough and J. C. Nieh, “Honeybees tune excitatory and inhibitory recruitment  
250 signalling to resource value and predation risk,” *Animal Behaviour*, vol. 110, pp. 9–17, 2015.



- 251 [31] C. Grüter, R. Schürch, T. J. Czaczkes, K. Taylor, T. Durance, S. M. Jones, and F. L. W.  
252 Ratnieks, “Negative feedback enables fast and flexible collective decision-making in ants,” *PLoS*  
253 *ONE*, vol. 7, no. 9, p. e44501, 2012.
- 254 [32] D. M. Gordon, “The rewards of restraint in the collective regulation of foraging by harvester ant  
255 colonies,” *Nature*, vol. 498, no. 7452, pp. 91–93, 2013.
- 256 [33] N. Franks, T. Richardson, N. Stroeymeyt, R. Kirby, W. Amos, P. Hogan, J. Marshall, and  
257 T. Schlegel, “Speed–cohesion trade-offs in collective decision making in ants and the concept of  
258 precision in animal behaviour,” *Animal Behaviour*, vol. 85, no. 6, pp. 1233–1244, 2013.
- 259 [34] N. Zabzina, A. Dussutour, R. P. Mann, D. J. T. Sumpter, and S. C. Nicolis, “Symmetry  
260 restoring bifurcation in collective decision-making,” *PLoS computational biology*, vol. 10, no. 12,  
261 p. e1003960, 2014.
- 262 [35] I. Lestas, G. Vinnicombe, and J. Paulsson, “Fundamental limits on the suppression of molecular  
263 fluctuations,” *Nature*, vol. 467, no. 7312, pp. 174–178, 2010.
- 264 [36] A. S. Howell, M. Jin, C.-F. Wu, T. R. Zyla, T. C. Elston, and D. J. Lew, “Negative feedback  
265 enhances robustness in the yeast polarity establishment circuit,” *Cell*, vol. 149, no. 2, pp. 322–333,  
266 2012.
- 267 [37] L. Laurenti, A. Csikasz-Nagy, M. Kwiatkowska, and L. Cardelli, “Molecular filters for noise  
268 reduction,” *Biophysical Journal*, vol. 114, no. 12, pp. 3000–3011, 2018.
- 269 [38] C. D. Motchenbacher and J. A. Connelly, *Low noise electronic system design*. Wiley, 1993.
- 270 [39] D. Pan, X. Ruan, C. Bao, W. Li, and X. Wang, “Capacitor-current-feedback active damping  
271 with reduced computation delay for improving robustness of LCL-type grid-connected inverter,”  
272 *IEEE Transactions on Power Electronics*, vol. 29, no. 7, pp. 3414–3427, 2014.
- 273 [40] S. Dong, K. Tan, Q. Zhang, and J. C. Nieh, “Playbacks of asian honey bee stop signals demon-  
274 strate referential inhibitory communication,” *Animal Behaviour*, vol. 148, pp. 29–37, 2019.
- 275 [41] F.-X. Dechaume-Moncharmont, A. Dornhaus, A. I. Houston, J. M. McNamara, E. J. Collins, and  
276 N. R. Franks, “The hidden cost of information in collective foraging,” *Proceedings of the Royal*  
277 *Society B: Biological Sciences*, vol. 272, no. 1573, pp. 1689–1695, 2005.
- 278 [42] C. Grüter and E. Leadbeater, “Insights from insects about adaptive social information use,”  
279 *Trends in Ecology & Evolution*, vol. 29, no. 3, pp. 177–184, 2014.
- 280 [43] J. C. Biesmeijer and T. D. Seeley, “The use of waggle dance information by honey bees throughout  
281 their foraging careers,” *Behavioral Ecology and Sociobiology*, vol. 59, no. 1, pp. 133–142, 2005.
- 282 [44] C. Grüter, E. Leadbeater, and F. L. Ratnieks, “Social learning: The importance of copying  
283 others,” *Current Biology*, vol. 20, no. 16, pp. R683–R685, 2010.

- 284 [45] M. C. Donaldson-Matasci and A. Dornhaus, “How habitat affects the benefits of communication  
285 in collectively foraging honey bees,” *Behavioral Ecology and Sociobiology*, vol. 66, no. 4, pp. 583–  
286 592, 2012.
- 287 [46] T. J. Czaczkes, C. Grüter, and F. L. W. Ratnieks, “Negative feedback in ants: crowding results  
288 in less trail pheromone deposition,” *Journal of The Royal Society Interface*, vol. 10, no. 81,  
289 p. 20121009, 2013.
- 290 [47] S. Wendt, N. Kleinhoelting, and T. J. Czaczkes, “Negative feedback: ants choose unoccupied over  
291 occupied food sources and lay more pheromone to them,” *Journal of The Royal Society Interface*,  
292 vol. 17, no. 163, p. 20190661, 2020.
- 293 [48] K. v. Frisch and R. Jander, “Über den schwänzeltanz der bienen,” *Zeitschrift für vergleichende*  
294 *Physiologie*, vol. 40, no. 3, pp. 239–263, 1957.
- 295 [49] B. Hölldobler, R. C. Stanton, and H. Markl, “Recruitment and food-retrieving behavior in  
296 novomessor (formicidae, hymenoptera): I. chemical signals,” *Behavioral Ecology and Sociobi-*  
297 *ology*, vol. 4, pp. 163–181, 1978.
- 298 [50] J. C. Nieh, “The stop signal of honey bees: reconsidering its message,” *Behavioral Ecology and*  
299 *Sociobiology*, vol. 33, no. 1, pp. 51–56, 1993.
- 300 [51] T. D. Seeley, “Consensus building during nest-site selection in honey bee swarms: the expiration  
301 of dissent,” *Behavioral Ecology and Sociobiology*, vol. 53, no. 6, pp. 417–424, 2003.
- 302 [52] J. A. R. Marshall, A. Reina, and T. Bose, “Multiscale modelling tool: Mathematical modelling  
303 of collective behaviour without the maths,” *PLoS ONE*, vol. 14, no. 9, p. e0222906, 2019.
- 304 [53] T. Biancalani, L. Dyson, and A. J. McKane, “Noise-induced bistable states and their mean  
305 switching time in foraging colonies,” *Physical Review Letters*, vol. 112, no. 3, p. 038101, 2014.
- 306 [54] Y. Khaluf, C. Pinciroli, G. Valentini, and H. Hamann, “The impact of agent density on scala-  
307 bility in collective systems: noise-induced versus majority-based bistability,” *Swarm Intelligence*,  
308 vol. 11, no. 2, pp. 155–179, 2017.

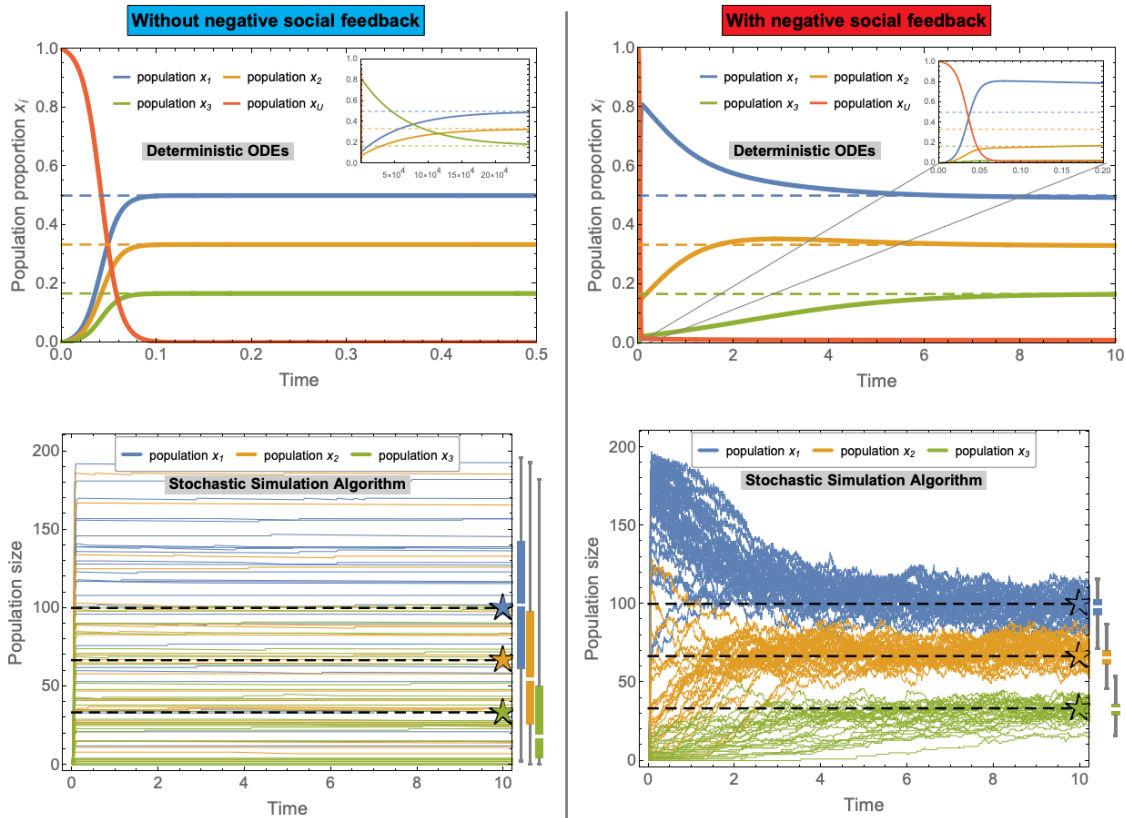

Figure 1: Temporal evolution of the models without (left) and with (right) negative social feedback in an environment with  $n = 3$  food patches with qualities  $q_1 = 0.75, q_2 = 0.5, q_3 = 0.25$ . The top panels show the dynamics of the ODEs for systems of infinite size  $S \rightarrow \infty$ . The bottom panels show the trajectories of 30 representative runs of the stochastic simulation algorithm (SSA, [25]) for a system comprised of  $S = 200$  individuals. The boxplots on the right of each bottom panel show the statistical aggregate at time 400 for 1000 runs of the SSA. (Other simulation parameters are: constant abandonment  $a = 10^{-3}$ , average recruitment strength  $r = 100$ , and stop signal strength  $z \simeq 3.1$ .) While the infinite size dynamics predict convergence to the target distribution of Eq. (1) (dashed lines) for both models, the stochastic trajectories show different results for the two models. The system without negative social feedback has smaller fluctuations over time but frequently stabilises at values far from the target distribution (bottom-left panel). The system with negative social feedback fluctuates more but always remains relatively close to the target distribution (bottom-right panel). The apparently quicker dynamics of the ODE model for the system without negative social feedback are due to the symmetric initial conditions. In the left inset, we show that a small perturbation of the initial population (*i.e.*  $x_1, x_2 = 0$  and  $x_3 = 0.05$ ) delays the convergence by more than 5 orders of magnitude. Such a susceptibility to random fluctuations is made evident by the stochastic trajectories. The right inset shows a zoom of the larger plot.

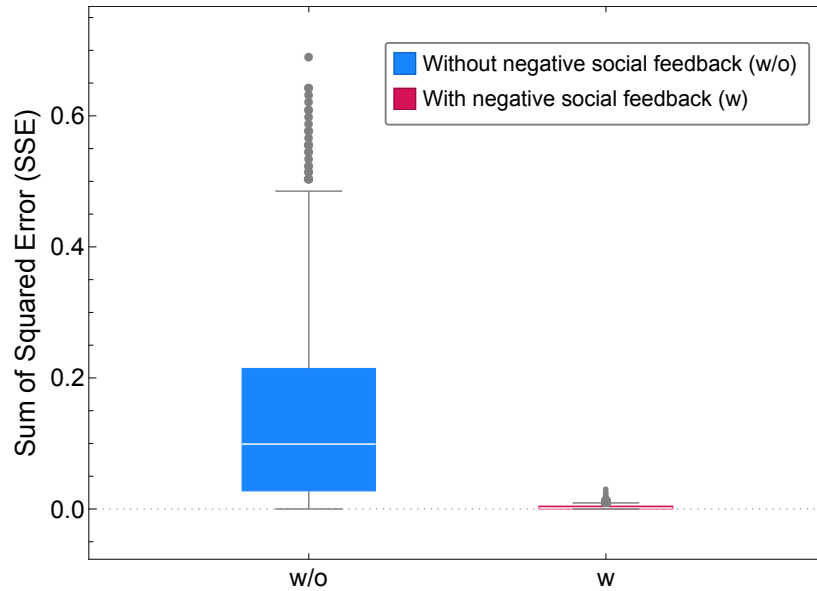

Figure 2: Sum of squared errors (SSE) computed as the sum for  $n = 2$  food patches of the square of the difference between the subpopulation size at time 1000 (convergence) and the target distribution to that patch (see Supplementary Text ST7). The boxplots show the distribution of the SSE for  $10^3$  numerical simulations for swarm size  $S = 200$ , average recruitment strength  $r = 100$ , and qualities  $q_1 = 0.75$  and  $q_2 = 0.5$ .

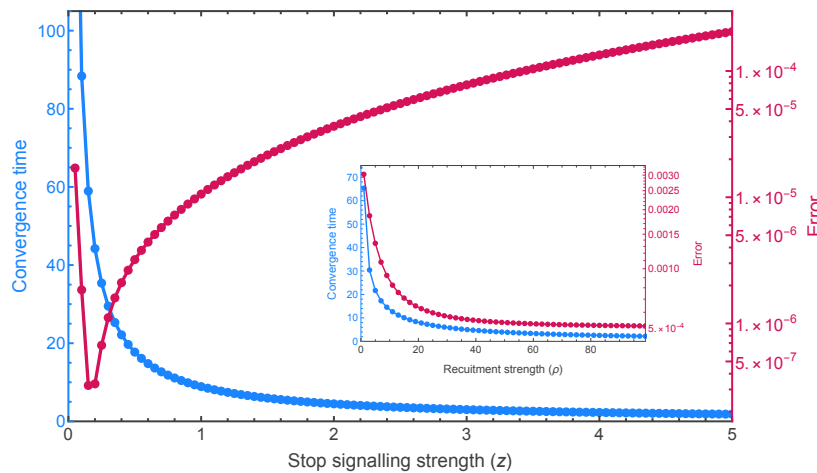

Figure 3: The stop signalling strength can be the control parameter in a speed-robustness trade-off. Stronger stop signalling speeds up the convergence of the system (magenta curve) but also increases the predicted error from the target distribution (blue curve). These results are in agreement with field observations that documented an increase in stop signalling when a quick response to environmental changes was necessary [10]. Both error and convergence time are computed from the infinite population model (ODE). The error is computed as the sum for every foraging population of the squared distance  $R^2$  from the target at large time (convergence, computed analytically as the ODE's stable fixed point in the unit-simplex). The convergence time (magenta curve) is computed as the time necessary to reach the (numerically computed) fixed point. As the system has an asymptotic convergence, the reported time corresponds to the  $R^2$  error becoming smaller than  $10^{-4}$ .
